# Supplementary material
Source: MDPI journal article supplement (https://www.mdpi.com/2076-3417/14/5/2010)
Supplement: s1 [file s1]

Archive with 2 entries (2 files):
- SupplementalFigures1-4LactoMDPI.pdf
- Table S1.xlsx
