# Supplementary material
Source: MDPI journal article supplement (https://www.mdpi.com/2076-3417/14/5/2010)
Supplement: s1 [file s1 › Table S1.xlsx]

## Sheet: cargillacidbileud
ID	Species	Percent Growth pH 2	Percent Growth pH 3	Percent Growth pH 4	Percent Growth 0.3% bile	Percent Growth 0.15% bile	Percent Growth 0.03% bile	Percent Adhesion	Bile Salt Hydrolase activity
MOF2W3LC2	W. paramesenteroides	21.6521	26.8181	27.3858	31.0982	63.9901	91.3099	45.0702	-
SNF2W3B2M1	L. crispatus	19.0415	13.0242	28.2845	0.815481	42.6095	88.08	67.6942	+
MOF2W1B3C5	L. gallinarum	22.4121	14.4051	22.9858	1.52704	28.9499	80.0573	70.7711	+
MOF2W3B1T2	L. crispatus	34.9933	27.328	31.0659	4.15525	60.5064	80.082	72.3853	+
MOF2W6B4C3	L. salivarius	12.8981	19.6904	45.4834	2.06562	41.4319	93.2202	73.0247	+
MOF2W2LT2	W. paramesenteroides	25.9169	31.4914	29.149	41.7339	72.9346	82.9448	75.1338	-
MOF2W6B4C8	L. crispatus	19.5586	10.3789	24.6418	0.842232	24.8555	53.5761	76.2691	+
MOF2W3B5T3	L. gallinarum	20.9004	17.9424	14.0247	0.324467	52.0668	88.6996	77.8289	+
SNF2W6B1L3	L. crispatus	21.0684	24.7191	35.235	3.13508	58.3231	87.0217	79.6656	+
SNF2W3B1L8	L. gallinarum	22.0369	19.2616	25.4938	2.88674	55.4945	83.4537	80.2799	+
UMNLJ21	L. johnsonii	38.5675	23.0627	26.421	3.08243	55.948	85.8562	81.418	-
MOF2W6B4C10	L. crispatus	17.3853	14.9066	15.2708	1.7797	24.6758	84.1148	81.7101	+
MOF2W5B1C1	L. gallinarum	14.8314	15.1132	29.073	6.2588	55.3231	89.1794	83.3597	+
MOF2W1LC6	P. acidilactici	30.9205	49.3653	73.3709	62.4053	82.1699	90.4672	84.3122	-
MOF2W1LT10	P. acidilactici	27.7832	34.2572	58.7316	38.3051	76.2369	90.9648	86.5587	-
MOF2W3B1T3	L. salivarius	10.2444	20.6777	49.1863	16.7962	63.8592	88.9432	86.6558	+
SNF2W1B5L4	L. johnsonii	5.11361	19.3848	10.6527	2.07953	41.1794	104.942	87.4149	+
MOF2W1LC8	W. paramesenteroides	24.8221	30.5674	28.464	37.4901	70.0207	100.219	88.5171	-
SNF2W3B1L7	L. vaginalis	9.54535	22.5047	90.1365	5.5004	53.6344	41.4662	88.9012	-
SNF2W3B2M2	L. reuteri	27.1967	21.1944	28.8893	16.295	53.8003	86.0692	89.0136	+
SNF2W3B3L6	L. johnsonii	17.2533	14.514	12.4925	2.72065	53.6125	91.9464	89.356	+
MOF2W3B1C8	L. reuteri	21.8199	23.0743	60.5586	14.4133	49.3003	87.1005	90.125	-
MOF2W5B3T3	P. acidilactici	26.6678	43.1733	76.7324	75.9736	90.2904	97.9081	90.2312	-
MOF2W10B1T3	L. gallinarum	19.2512	8.93739	32.1061	1.94301	61.7502	84.4841	90.9809	+
